# Supplementary material
Source: MDPI journal article supplement (https://www.mdpi.com/2673-4117/4/1/22)
Supplement: s1 [file s1]

Supporting document

# Enhanced Performance Electrochemical Biosensor for Detection of Prostate Cancer Biomarker PCA3 Using Specific Aptamer

Sarra Takita <sup>1,\*</sup>, Alexei Nabok <sup>1</sup>, Anna Lishchuk <sup>2</sup>, Magdi H. Mussa <sup>1,3</sup> and David Smith <sup>4</sup>

<sup>1</sup> Material and Engineering Research Institute (MERI), Sheffield Hallam University, Sheffield S1 1WB, UK

<sup>2</sup> Department of Chemistry, University of Sheffield, Brook Hill, Sheffield S3 7HF, UK

<sup>3</sup> The Institute of Marine Engineering, Science and Technology, London SW1H 9JJ, UK

<sup>4</sup> Biomolecular Sciences Research Centre (BMRC), Sheffield Hallam University, Sheffield S1 1WB, UK

\* Correspondence: st3805@exchange.shu.ac.uk ; Tel.: +44-7404731366

## S1. Electrochemical detection of PCA3 using cyclic voltammetry method.

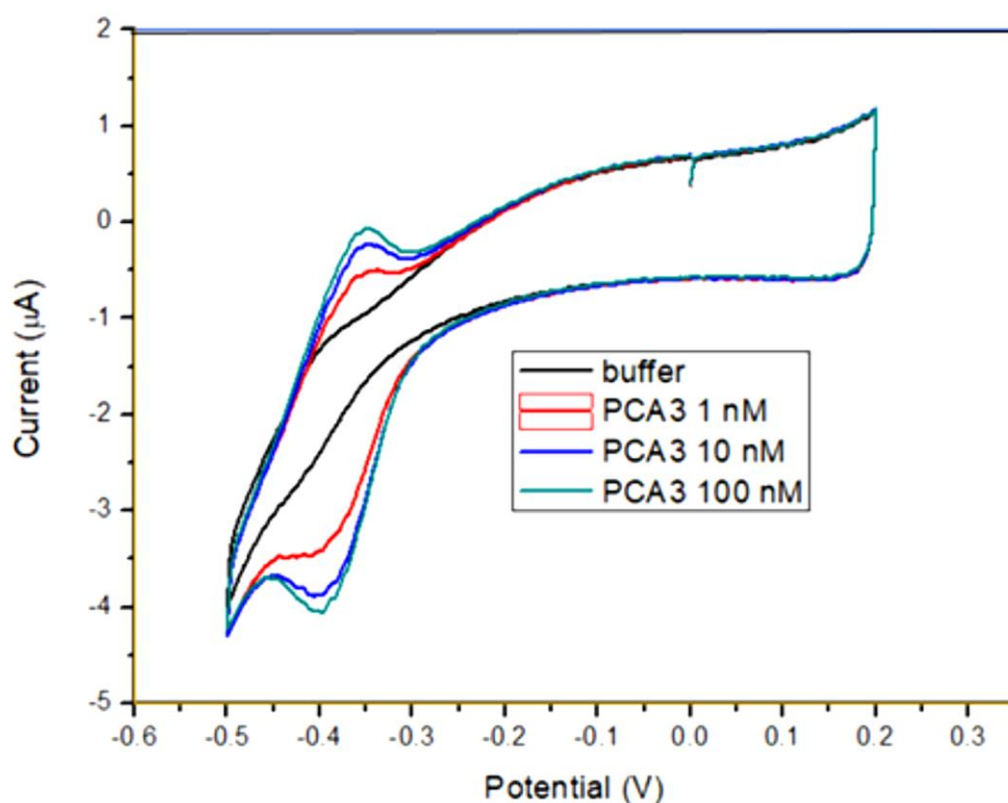

**Figure S1.** Series of CV curves for 3 µM aptamer immobilised on SPGE before and after binding PCA3 of different concentrations (0, 1, 10, and 100 nM) where the MB's redox potential ranges around -0.4 V.
